# Supplementary material
Source: Springer Nature journal article supplement (https://www.springermedizin.de/resource/supplementary/12916_2012_781_MOESM5_ESM.pdf/9598304)

**A**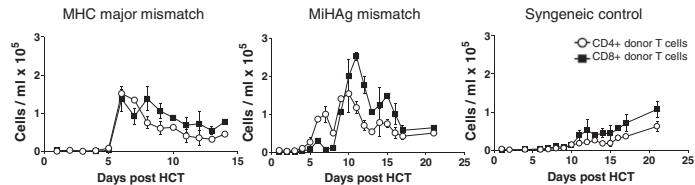**B**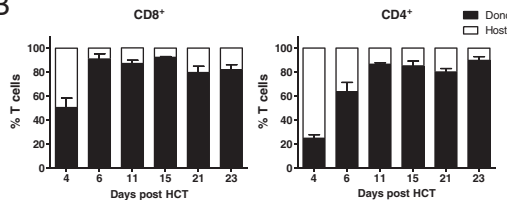**C**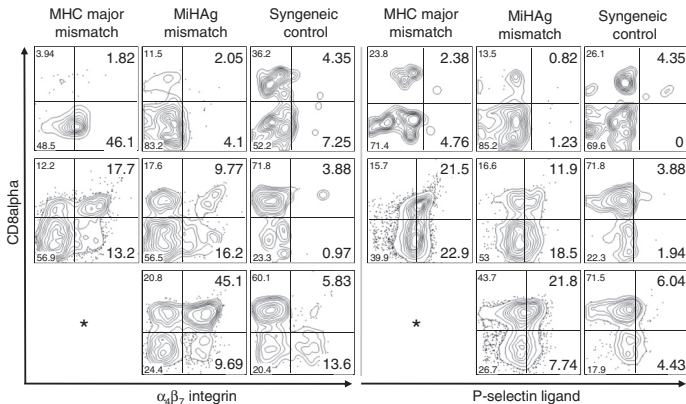**D**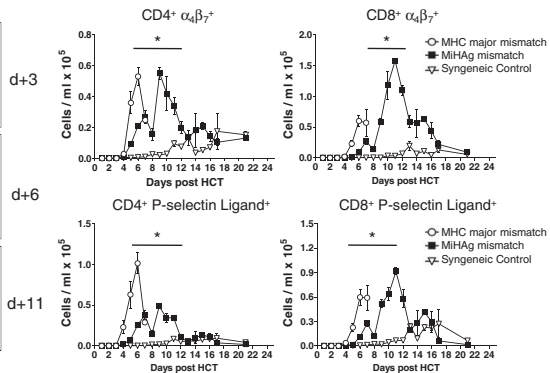

Supplement: MOESM5 [file 9598304]
